# Supplementary material for: Human T-Cell Responses to Metallic Ion-Doped Bioactive Glasses
Source: Int J Mol Sci. 2024 Apr 19;25(8):4501. doi: 10.3390/ijms25084501 (PMC11050560; doi:10.3390/ijms25084501)
Supplement: Supplementary file 1 [file ijms-25-04501-s001.zip › ijms-2942596-supplementary.pdf]

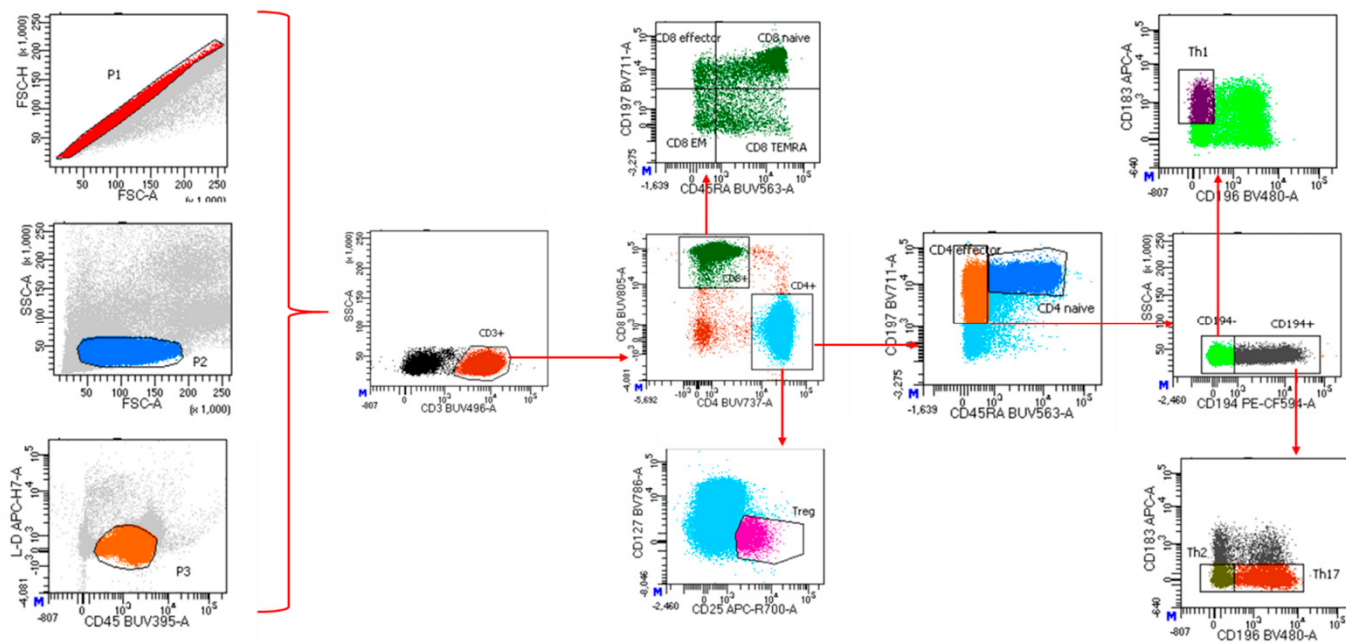

**Figure S1.** Gating strategy. Arrows describe the hierarchical sequences of analysis. Singlets were selected from the FSC-A versus FSC-H dot plot and cells were gated based on SSC-A versus FSC-A. Live lymphocytes were gated as CD45<sup>+</sup> and Fixable Viability Dye 780<sup>-</sup> (L/D<sup>-</sup>). T cells were identified as CD3<sup>+</sup>. CD4<sup>+</sup> and CD8<sup>+</sup> T cells were identified accordingly to the expression of their surface markers. In the CD8 subset, naïve cells were classified as CD197<sup>+</sup>CD45RA<sup>+</sup>, effector cells as CD197<sup>+</sup>CD45RA<sup>-</sup>, effector memory cells as CD197<sup>-</sup>CD45RA<sup>-</sup>, and terminally differentiated effector memory cells as CD197<sup>-</sup>CD45RA<sup>+</sup>. In the CD4 subset, naïve cells were classified as CD197<sup>+</sup>CD45RA<sup>+</sup>, and effector cells as CD197<sup>+</sup>CD45RA<sup>-</sup>. Tregs cells were classified as CD4<sup>+</sup>CD127<sup>-</sup>CD25<sup>+</sup>. T helper 1 cells were classified as CD194<sup>-</sup>CD183<sup>+</sup>CD196<sup>-</sup>, T helper 2 as CD194<sup>+</sup>CD183<sup>-</sup>CD196<sup>-</sup> and T helper 17 as CD194<sup>+</sup>CD183<sup>-</sup>CD196<sup>+</sup>.
